# Table of Contents

## FEATURES

### *Educator Highlight*

#### **Phoebe Lostroh**

Interviewed by Laura L. Mays Hoopes.....163–164

### *WWW.Life Sciences Education*

#### **How Animals Work**

Dennis Liu.....165–170

### *Current Insights*

#### **Recent Research in Science Teaching and Learning**

Erin Dolan.....171–172

### *Book Review*

#### **Model Organisms: Guinea Pigs & Co.**

José Vázquez.....173–174

## ESSAYS

### **Nanocourses: A Short Course Format as an Educational Tool in a Biological Sciences Graduate Curriculum**

Anna M. Bentley, Spyros Artavanis-Tsakonas, and Jennifer S. Stanford.....175–183

### **Parasitology as a Teaching Tool: Isolation of Apicomplexan Cysts from Store-bought Meat**

Tracy L. Eggleston, Eileen Fitzpatrick, and Kristin M. Hager.....184–192

## ARTICLES

### **Evaluating Two Approaches to Helping College Students Understand Evolutionary Trees through**

#### **Diagramming Tasks**

Judy Perry, Eli Meir, Jon C. Herron, Susan Maruca, and Derek Stal.....193–201

### **An Imaging Roadmap for Biology Education: From Nanoparticles to Whole Organisms**

Daniel J. Kelley, Richard J. Davidson, and David L. Nelson.....202–209

### **A Microcosm of the Biomedical Research Experience for Upper-level Undergraduates**

Daryl D. Hurd.....210–219

### **Globalizing the Science Curriculum: An Undergraduate Course on Traditional Chinese Medicine as a Complementary Approach to Western Medicine**

Robert Yuan and Yuan Lin.....220–226

### **Understanding Randomness and its Impact on Student Learning: Lessons Learned from Building the**

#### **Biology Concept Inventory (BCI)**

Kathy Garvin-Doxas and Michael W. Klymkowsky.....227–233

### **Assessment of the Effectiveness of the Studio Format in Introductory Undergraduate Biology**

Beth A. Montelone, David A. Rintoul, and Larry G. Williams.....234–242

### **Implementing Concept-based Learning in a Large Undergraduate Classroom**

David Morse and France Jutras.....243–253

### **Gauging the Gaps in Student Problem-Solving Skills: Assessment of Individual and Group Use of**

#### **Problem-Solving Strategies Using Online Discussions**

William L. Anderson, Steven M. Mitchell, and Marcy P. Osgood.....254–262

### *On the Cover*

Cover illustrates results from an undergraduate inquiry-based teaching laboratory. Micrographs at top show two novel phenotypes affecting mating structures in the nematode *C. elegans*, revealed in a functional screen using RNA-mediated interference (RNAi). RNAi of the zinc-finger homeodomain protein ZC123.3 causes a prolapsed hermaphrodite vulva, and RNAi of the abnormal spindle microcephaly protein C45G3.1 causes missing male tail sensory rays. Lower figure is a concept map relating steps in the process of molecular cloning, created by students after laboratory experience with enzymatic tools and purification kits commonly used to manipulate DNA. See article by Hurd on page 210.
